# Supplementary material for: Evidence of Audience Design in Amnesia: Adaptation in Gesture but Not Speech
Source: MDPI journal article supplement (doi:10.3390/brainsci12081082), 2022-08-16
Supplement: s1 [file s1]

## Supplementary Materials B: Speech Coding Guide

**Essential Steps:** Steps determined *a priori* by consensus of 2 authors that reflect the minimum steps required to successfully complete task

**Optional Steps:** Instructions to do things that are beyond essential steps.

**Semantic Information**

Safety: Additional information pertaining to safety

Rationale clauses “So that you don’t get burnt when you put the lightbulb in”

Warnings: “This is dangerous.” “Don’t drop it.” “Don’t screw it in too tight.”

World knowledge/elaboration: providing additional information about the objects or tasks involved.

About objects: “Most coffee machines have a timer.” “It’ll be red.”

About actions: “It screws in counterclockwise.”

About personal routines: “In my microwave, I use a splatter shield.”

Generalizations: “Most bulbs are 60 watts.”

What not to do’s: “Leave the shade on.” “Don’t unplug it.”

Locations: “It sits on the burner.” “Those are kept in the hallway closet.”

**Management**

Feedback: Direct input to listener

“Do you want it [coffee] to be light or dark?” “That’s the wrong foot.” “Perfect!” “You spilled a little but we’ll clean it up.” “You know what a bunny’s ear looks like.” “Did I tell you about the water?”

Task management: Organizing task, stating assumptions, or metacognitive statements

“We’re going to change the lightbulb in the table lamp.” “It’s already plugged in.” “and then you should probably have a good bow.” “Let’s say we’re making mac and cheese.” “That’s it, I think.” “It’s so much harder when you’re not actually doing it.”

**Repetition**

Repetition: a step that has been repeated (note: doesn’t count as repetition if the same step represents a different stage in the task – e.g., tightening shoe multiple times throughout tying process)

Restarts: incomplete thoughts, abandoned utterances

\*See below for common examples from participant transcripts for each category

**Essential Steps**

|                                                                                                                                                                                                                               |                                                                                                                                                                                                                                                                             |
|-------------------------------------------------------------------------------------------------------------------------------------------------------------------------------------------------------------------------------|-----------------------------------------------------------------------------------------------------------------------------------------------------------------------------------------------------------------------------------------------------------------------------|
| <b>Coffee</b>                                                                                                                                                                                                                 | <b>Lamp</b>                                                                                                                                                                                                                                                                 |
| <ol style="list-style-type: none"> <li>1. Get the coffee</li> <li>2. Put a filter in</li> <li>3. Put the coffee in</li> <li>4. Put water in</li> <li>5. Put a container underneath</li> <li>6. Turn on the machine</li> </ol> | <ol style="list-style-type: none"> <li>1. Unplug lamp/make sure it's off</li> <li>2. Unscrew the lightbulb</li> <li>3. Get/find a new lightbulb</li> <li>4. Screw new bulb in</li> <li>5. Turn on light/Check to make sure it works</li> </ol>                              |
| <b>Microwave</b>                                                                                                                                                                                                              | <b>Shoe</b>                                                                                                                                                                                                                                                                 |
| <ol style="list-style-type: none"> <li>1. Get food from fridge</li> <li>2. Put it in microwave</li> <li>3. Set time</li> <li>4. Hit start</li> </ol>                                                                          | <ol style="list-style-type: none"> <li>1. Pull laces tight</li> <li>2. Cross laces</li> <li>3. Fold one under</li> <li>4. Tighten</li> <li>5. Create a loop</li> <li>6. Wrap a string around the loop</li> <li>7. Poke through space</li> <li>8. Pull to tighten</li> </ol> |

**Optional Steps**

| <b>Coffee</b>                                                                                                                                                                                                                                                                                                                                                                                                                                                                                                                   | <b>Lamp</b>                                                                                                                                                                                                                                                                                                                                                                                                                                       |
|---------------------------------------------------------------------------------------------------------------------------------------------------------------------------------------------------------------------------------------------------------------------------------------------------------------------------------------------------------------------------------------------------------------------------------------------------------------------------------------------------------------------------------|---------------------------------------------------------------------------------------------------------------------------------------------------------------------------------------------------------------------------------------------------------------------------------------------------------------------------------------------------------------------------------------------------------------------------------------------------|
| Go into the kitchen<br>Grind the beans<br>Get the coffee pot out<br>Rinse out coffee pot<br>Get chair to stand on<br>Open tray/lid<br>Remove the basket<br>Throw old filter away<br>Get a coffee filter<br>Open coffee filter up<br>Close tray/lid<br>Read instructions<br>Open the lid to the coffee<br>Scoop/measure the coffee<br>Take the pot to the sink<br>Turn on the water<br>Fill coffee pot with water<br>Take it back to the coffee maker<br>Plug in the coffee pot<br>Get sugar/cream or other supplies<br>Drink it | Go over to the lamp<br>Get an adult<br>Check whether bulb is burnt out<br>Unscrew shade/remove screw<br>Remove shade<br>Set shade down<br>Dump out bugs<br>Get a pair of gloves<br>Check wattage on bulb<br>Set old bulb down<br>Throw old bulb away<br>Buy a new bulb<br>Go to the cupboard/closet<br>Put bulb into socket<br>Put shade back on lamp<br>Screw shade back in<br>Plug the lamp back in<br>Turn lamp off again<br>Put supplies away |
| <b>Microwave</b>                                                                                                                                                                                                                                                                                                                                                                                                                                                                                                                | <b>Shoe</b>                                                                                                                                                                                                                                                                                                                                                                                                                                       |
| Go to the fridge<br>Get out a plate/bowl<br>Put food on plate or in container<br>Read the instructions<br>Loosen lid<br>Carry container to microwave<br>Open the microwave door<br>Put a shield/paper towel on top<br>Shut the microwave door<br>Set the temperature/power<br>Wait for it to heat up<br>Check temperature<br>Stir food<br>Reheat<br>Take it out<br>Set it on table<br>Eat it                                                                                                                                    | Sit down<br>Loosen the laces<br>Put the shoe on<br>Pull out the tongue<br>Pick up the laces<br>Make laces same length<br>Hold lace between fingers<br>Hold knot down with your finger<br>Switch hands<br>Grab the lace with [...] hand<br>Make a loop with the other string<br>Pull finger out of way<br>Adjust size of bow                                                                                                                       |

**Semantic Information**

| <b>Coffee</b>                                                                                                                                                                                                                                                                                                                                                                                                                                                                                                                                                                                                                                                                                                                                                                              | <b>Lamp</b>                                                                                                                                                                                                                                                                                                                                                                                                                                                                                                                                                                                                                                                                             |
|--------------------------------------------------------------------------------------------------------------------------------------------------------------------------------------------------------------------------------------------------------------------------------------------------------------------------------------------------------------------------------------------------------------------------------------------------------------------------------------------------------------------------------------------------------------------------------------------------------------------------------------------------------------------------------------------------------------------------------------------------------------------------------------------|-----------------------------------------------------------------------------------------------------------------------------------------------------------------------------------------------------------------------------------------------------------------------------------------------------------------------------------------------------------------------------------------------------------------------------------------------------------------------------------------------------------------------------------------------------------------------------------------------------------------------------------------------------------------------------------------|
| <p> The coffee pot is in the kitchen<br/> It might be unplugged<br/> Don't touch the metal prongs<br/> There's a tray that pulls out<br/> Inside there's a basket<br/> The basket holds the filter<br/> It will probably have an old filter in it<br/> That's where the coffee goes<br/> The coffee is kept [...]<br/> It's already ground up<br/> There's a scoop inside<br/> Use one tbsp per cup<br/> More coffee makes it stronger<br/> It is a glass pot<br/> There are measurement readings on the side<br/> There's a lid that goes on top<br/> It's on the back<br/> There's a button that turns it on<br/> It's red<br/> Most coffee machines have a timer<br/> The coffee will drip down<br/> The coffee is ready when the timer goes off<br/> It takes about [...] minutes </p> | <p> The lightbulb might be hot<br/> I always unplug it<br/> Don't electrocute yourself<br/> You light should be turned off<br/> I leave the light shade on<br/> There might be bugs<br/> You can use gloves/pliers<br/> It screws out by rotating<br/> You turn it [...] direction to (un)screw it<br/> The lightbulbs are glass<br/> You have to be careful<br/> Don't break the bulb/drop it<br/> Lightbulbs come in different wattages/kinds<br/> It's usually [...] watts<br/> There is a number on the top<br/> You have to get the right one<br/> They are in the cupboard/drawer<br/> It will tighten up<br/> Don't force it<br/> Be careful<br/> Don't look directly at it </p> |
| <b>Microwave</b>                                                                                                                                                                                                                                                                                                                                                                                                                                                                                                                                                                                                                                                                                                                                                                           | <b>Shoe</b>                                                                                                                                                                                                                                                                                                                                                                                                                                                                                                                                                                                                                                                                             |
| <p> Not every container can go in the microwave<br/> Don't put metal in the microwave<br/> I usually use a paper plate<br/> I use a spatter shield<br/> There's a button that pops the door open<br/> There's a rotating table<br/> The food might come with instructions<br/> For (insert food), heat [...] seconds<br/> Make sure you don't do minutes<br/> There is a number pad<br/> There's a button that says [...]<br/> The microwave will ding when it's done<br/> Cook longer for big items<br/> It might make a mess<br/> There's a viewing window<br/> When it's hot, you eat it<br/> There might be steam<br/> Don't burn your mouth </p>                                                                                                                                      | <p> You don't have to put the shoe on<br/> It should be comfortable on your foot<br/> There are two laces<br/> The laces are about a foot long<br/> It's a two-part knot<br/> The first part is an overhand knot/slip knot<br/> It will look like an [...]<br/> It should be a circle<br/> They look like bunny ears<br/> There will be an opening in the loop<br/> It's like tying a package<br/> The loops might be uneven<br/> You can untie it by pulling </p>                                                                                                                                                                                                                      |

**Management**

| <b>Coffee</b>                                                                                                                                                                                                                                                                                                                                                                                                                                                                                                                                                                                                                                                                                                                          | <b>Lamp</b>                                                                                                                                                                                                                                                                                                                                                                                                                                                                                                                                                                                                                                                                                                                                                      |
|----------------------------------------------------------------------------------------------------------------------------------------------------------------------------------------------------------------------------------------------------------------------------------------------------------------------------------------------------------------------------------------------------------------------------------------------------------------------------------------------------------------------------------------------------------------------------------------------------------------------------------------------------------------------------------------------------------------------------------------|------------------------------------------------------------------------------------------------------------------------------------------------------------------------------------------------------------------------------------------------------------------------------------------------------------------------------------------------------------------------------------------------------------------------------------------------------------------------------------------------------------------------------------------------------------------------------------------------------------------------------------------------------------------------------------------------------------------------------------------------------------------|
| <p>           We're going to make coffee<br/>           The first step is...<br/>           Can I do an automatic?<br/>           I use a [...] coffee maker<br/>           I'm assuming the coffee pot is clean<br/>           It's already plugged in<br/>           Did I tell you about the water?<br/>           Let's pretend...<br/>           I think you need water<br/>           I don't know about [...]<br/>           I forgot a step<br/>           I'll move the chair<br/>           Very good<br/>           You spilled a little<br/>           There you go<br/>           You don't have to worry about that<br/>           And then it will come through<br/>           And then you've made coffee         </p> | <p>           I would tell an 8-yo...<br/>           We're going to change a lightbulb<br/>           The lightbulb burnt out last night<br/>           I'm assuming I have the right lightbulb<br/>           I'm assuming the lamp has a shade<br/>           I'm assuming the bulb is no longer working<br/>           I don't know [...]<br/>           We're going to make it easy<br/>           Do you see that [...]?<br/>           You have the bulb in your hand<br/>           What size is it?<br/>           I left a step out<br/>           I've got a lightbulb here<br/>           Good job<br/>           There you go<br/>           And then you should be done         </p>                                                                |
| <b>Microwave</b>                                                                                                                                                                                                                                                                                                                                                                                                                                                                                                                                                                                                                                                                                                                       | <b>Shoe</b>                                                                                                                                                                                                                                                                                                                                                                                                                                                                                                                                                                                                                                                                                                                                                      |
| <p>           We're going to make lunch<br/>           I'm assuming it's in a microwave container<br/>           Let's say you're making [...] food<br/>           I'm going to show you what buttons to push<br/>           The time is already set<br/>           Does it seem hot?<br/>           We might need a little more time<br/>           It's not so easy<br/>           Hopefully no smoke will come out<br/>           And then the food is heated/you're done<br/>           And there you go<br/>           Let's eat         </p>                                                                                                                                                                                     | <p>           We're going to tie a shoe<br/>           I'm assuming the shoe is laced<br/>           So you've got your shoe on your foot<br/>           That's the wrong foot<br/>           Let's start with [...] foot<br/>           He's right-handed<br/>           I do it the easy way<br/>           We're going to do the bunny ears method<br/>           You know what a bunny's ear looks like<br/>           He's in cub scouts<br/>           Now we're going to [...]<br/>           Now for the main part<br/>           So you have your loop<br/>           Very good<br/>           I skipped a step<br/>           This is much harder when you're not doing it<br/>           Then you'll have a bow/shoe is tied/ That's it.         </p> |
